# Supplementary material
Source: Springer Nature journal article supplement (https://www.springermedizin.de/resource/supplementary/12967_2013_1651_MOESM8_ESM.pdf/9574552)

### Cyst/ vacuoles

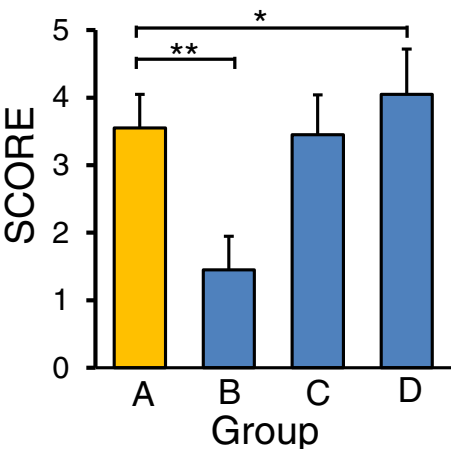

### Inflammation

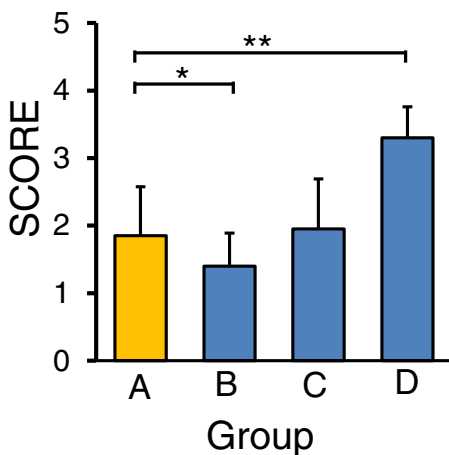

### Fibrosis

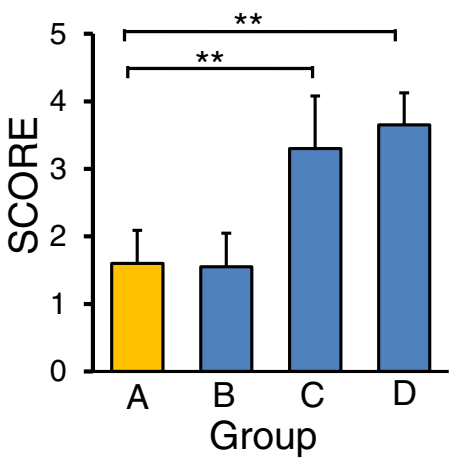

Supplement: MOESM8 [file 9574552]
